# Supplementary material
Source: PubMed Central journal article supplement (PMC3028669)
Supplement: supp_193_4_815__1.pdf [file supp_193_4_815__1.pdf]

FIG. S1 Comparison of the *E. coli* Cma sequence with Cma-like sequences of partially incomplete and unassigned genomes of the following strains: eco: colicin M activity protein Cma [*Escherichia coli*]; pct\_PBR1692: hypothetical protein PcarbP\_02847 [*Pectobacterium carotovorum* subsp. *brasiliensis* PBR1692]; pst: bacteriocin, putative [*Pseudomonas syringae* pv. *tomato* str. DC3000]; pph\_DVM: Cma [*Pseudomonas* phage DVM-2008]; pae: hypothetical protein EXA13 [*Pseudomonas aeruginosa*]; bac\_MC40-6: hypothetical protein BamMC406\_0333 [*Burkholderia ambifaria* MC40-6]; bub: hypothetical protein BuboB\_20394 [*Burkholderia ubonensis* Bu]; bok\_C6786: hypothetical protein BokIC\_29925 [*Burkholderia oklahomensis* C6786]; bok\_EO147: hypothetical protein BokIE\_30981 [*Burkholderia oklahomensis* EO147]; bac\_AMMD: hypothetical protein Bamb\_0324 [*B. ambifaria* AMMD]. Abbreviations were adapted according to <http://www.genome.jp/kegg/>. Amino acids that occur in all sequences are shaded red, and those that have similar properties are shaded yellow.

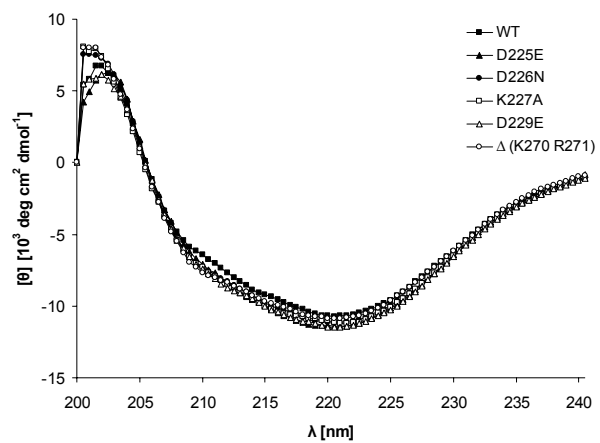

FIG. S2 CD spectra of the wild-type and mutant Cma proteins as indicated.

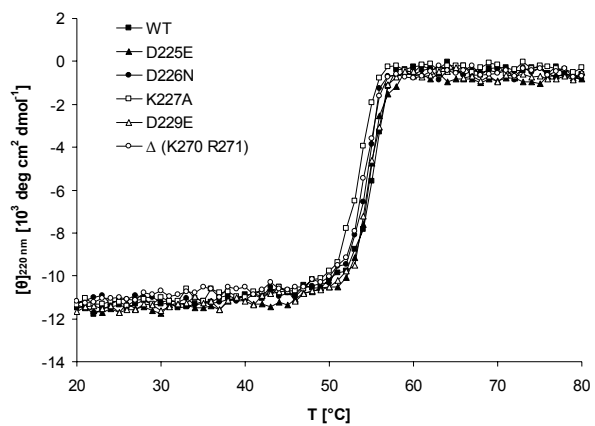

FIG. S3 Temperature-dependent denaturation of Cma (WT) and mutant Cma proteins as indicated.

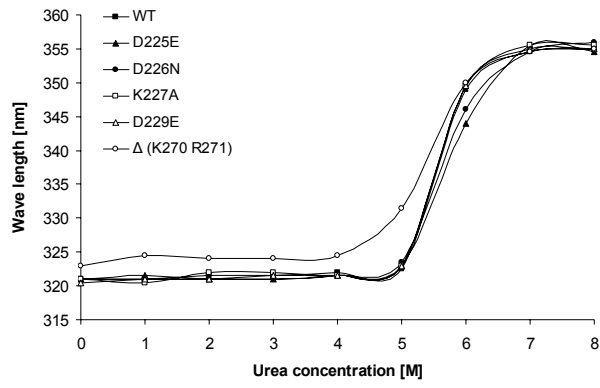

FIG. S4 Denaturation of Cma (WT) and mutant Cma proteins by various concentrations of urea. The shift in the fluorescence peak was determined.

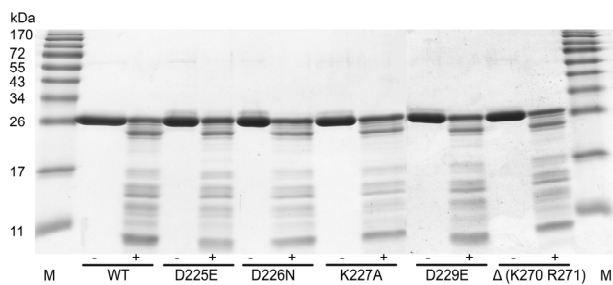

FIG. S5 SDS-PAGE of Cma (WT) and mutant Cma proteins purified by Ni-NTA agarose chromatography. +, incubation with proteinase K; -, no incubation with proteinase K.
